# Supplementary material for: Flow separation, dipole formation and water exchange through tidal strait
Source: Copernicus journal article supplement (doi:10.5194/os-2021-30), 2021-04-20
Supplement: Supplementary file [file os-2021-30-AC1-supplement.pdf]

# Sensitivity to mesh resolution: Figures

June 1, 2021

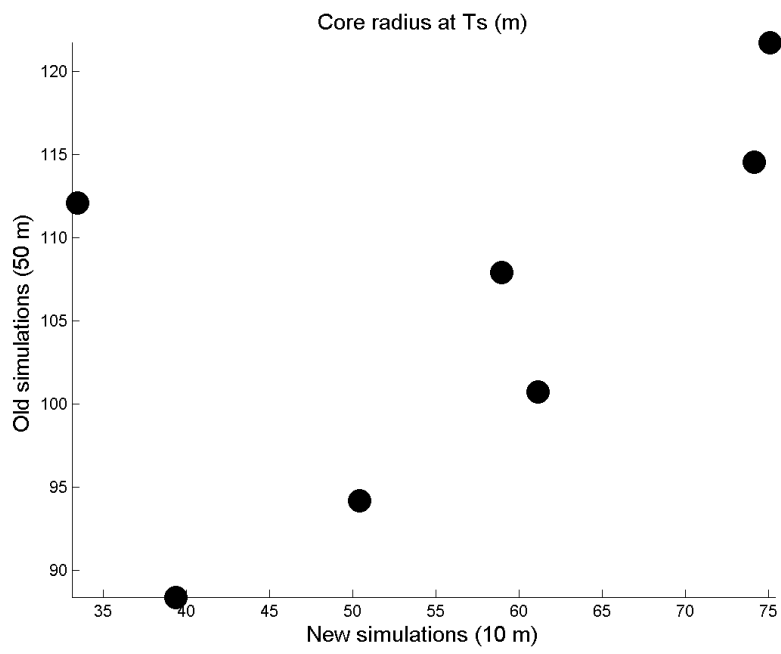

Figure 1: The core radius (m) of the dipole vortices at  $t = T_s$ .

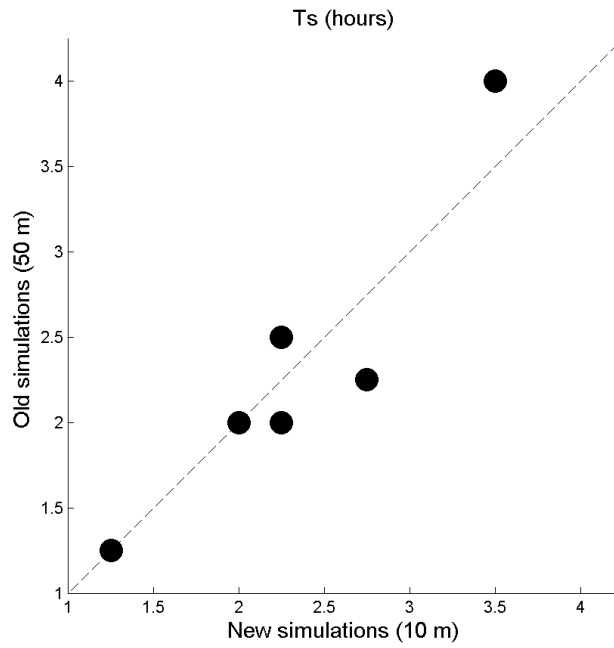

Figure 2: Time of flow separation,  $T_s$ , (hours)

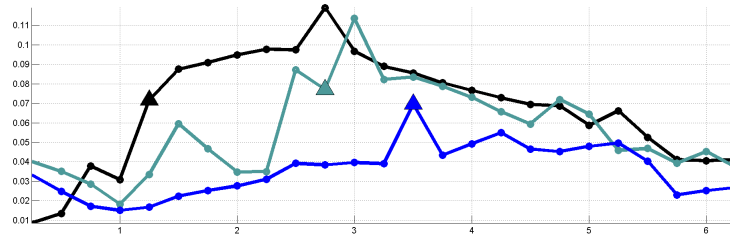

Figure 3: The maximum vorticity at the strait exit at a function of time (hours) for the three example experiments. The time  $T_s$  is marked with a triangle on each curve. This figure is the same as Figure 9 in the manuscript, but created from the 10m resolution simulations.

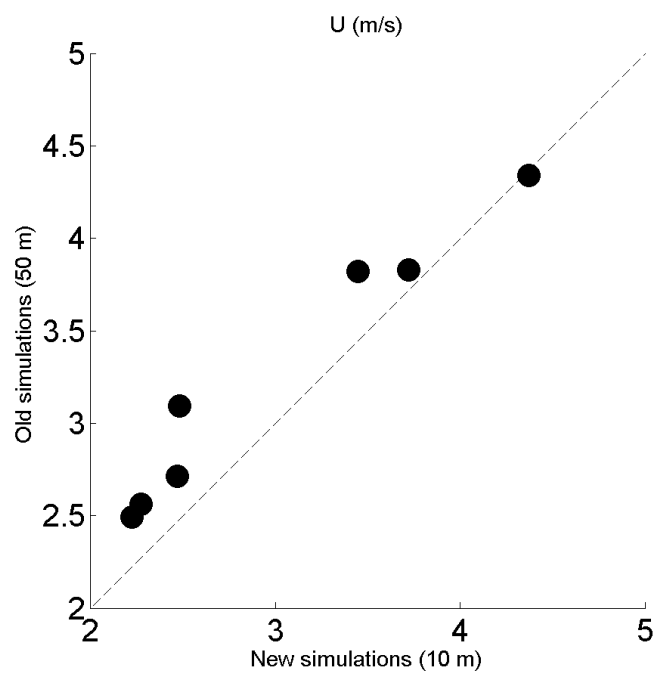

Figure 4: Velocity amplitude (m/s) in the strait

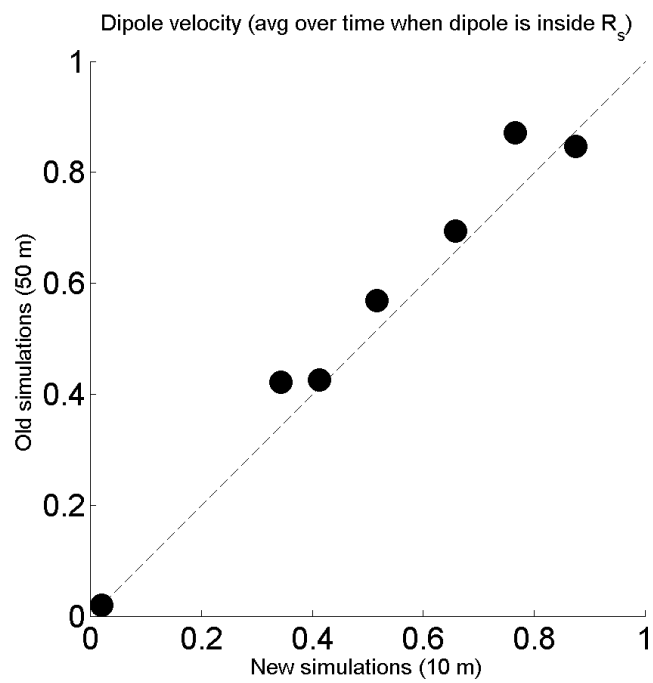

Figure 5: Tracked dipole velocities (m/s).



Figure 6: Effective transports
